# Supplementary material for: Bifidobacterium adolescentis improves lifespan and healthspan by regulating catalase activity and oxidative stress-associated metabolites
Source: Research Square preprint supplement (doi:10.21203/rs.3.rs-90247/v1), 2020-10-20
Supplement: Supplementary file 1 [file 9302d6b89dceb9cd81a3890a.pdf]

## Supplementary material

### Materials and Methods

#### qRT-PCR

Total RNA of flies, worms, mice tissue homogenate and cell lines was extracted using Trizol reagent (Ambion, USA). cDNA was synthesized with PrimeScriptRTase (TaKaRa, Japan). qRT-PCR was performed with SYBR Green Mix (TaKaRa, Japan) in Roche LightCycler480 (Roche, Mannheim, Germany) PCR instrument. The  $2^{-\Delta\Delta CT}$  method was used to determine relative mRNA expression. The primer sequences used are listed below.

| Primer                                          | Sequences (5' to 3')      |
|-------------------------------------------------|---------------------------|
| <b>Humans</b>                                   |                           |
| universal Eubacteria 16s F (internal reference) | CGGCAACGAGCGCAACCC        |
| universal Eubacteria 16s R (internal reference) | CCATTGTAGCACGTGTGTAGCC    |
| <i>B. adolescentis</i> F                        | CTCCGCCGCTGATCCGGAAGTCG   |
| <i>B. adolescentis</i> R                        | AACCAACTCGGCGATGTGGACGACA |
| <b><i>Caenorhabditis elegans</i></b>            |                           |
| act-3 F (internal reference)                    | TCGGTATGGGACAGAAGGAC      |
| act-3 R (internal reference)                    | CATCCCAGTTGGTGACGATA      |
| sod-3 F                                         | GCTGCAATCTACTGCTCGCACTG   |
| sod-3 R                                         | GGCTGATTACAGGTTCCAAATCTGC |
| ctl-2 F                                         | TCCCAGATGGGTACCGTCAT      |
| ctl-2 R                                         | AAGTTGACCGGCCTTCTCC       |
| daf-16 F                                        | ATCATCTTTCCGTCCCCG        |
| daf-16 R                                        | TTGGAATTGCTGGAACCG        |

|            |                        |
|------------|------------------------|
| atg-18 F   | AAGTTGGGGAGCTGATGACG   |
| atg-18 R   | CCGTCTGATGTAGCAGCCAT   |
| aak-2 F    | AGAGGTCACTGAGCGCTATC   |
| aak-2 R    | GTCCAGGTCCCTTATTCGGC   |
| hsp-12.6 F | TGGAGTTGTCAATGTCCTCG   |
| hsp-12.6 R | GACTTCAATCTCTTTTGGGAGG |
| lgg-1 F    | ACGCATCCAACTTCGTCCA    |
| lgg-1 R    | GACCTCTCCTCCATACACACTT |
| phm-2 F    | CCATCTCGTCCAGAGTTGATAC |
| phm-2 R    | GAGCTCCGAAGTGCTAATGT   |
| eat-2 F    | AACGATGAAGAAGCTGGGGG   |
| eat-2 R    | TAAGTGCTGTGGTGCCGAAT   |
| rsks-1 F   | CAAATTTCTGCTCCACCGCC   |
| rsks-1 R   | GATTTGGCCATTGTCGGAGC   |

***Drosophila melanogaster***

|                             |                       |
|-----------------------------|-----------------------|
| rp49 F (internal reference) | CACCGGATTCAAGAACTTCC  |
| rp49 R (internal reference) | GACAATCTCCTTGCGCTTCT  |
| sod-3 F                     | AATTGCAGCTCGGATGTGGA  |
| sod-3 R                     | GCACGTACAAATTGCAAGCAC |
| cat F                       | CAACCCCTTCGATGTCACCA  |
| cat R                       | TCTGCTCCACCTCAGCAAAG  |

**Mouse/Mouse embryonic fibroblasts**

|                              |                        |
|------------------------------|------------------------|
| actin F (internal reference) | TCCGCTCTCTGTCAAAGTGTG  |
| actin R (internal reference) | GGAGAGCATAGCCCTCGTAGAT |
| catalase-F                   | AGCGACCAGATGAAGCAGTG   |
| catalase-R                   | TCCGCTCTCTGTCAAAGTGTG  |

---

**Western blot**

Total proteins were extracted from mice skeletal muscle and brain tissue homogenate or MEFs using RIPA lysis buffer and quantified using BCA Protein Assay Kit (Beyotime, China). Protein was separated by SDS-PAGE and electrotransferred onto a PVDF membrane. The membranes were blocked with 5% fat-free milk for 2 h at room temperature and then incubated with primary antibody catalase (catalog No. 21260-1-AP, Proteintech) at 4°C overnight. Membranes were washed and incubated with anti-rabbit IgG antibody at room temperature for 2 h and the signal was detected using an ECL kit (Fdbio science, China).  $\beta$ -actin or GAPDH was used as a reference gene.

### **Cell culture and senescence**

Telomerase RNA component deletion intercrossed mice ( $Terc^{+/-}$ ) were used to derive MEFs as previously described (5). Cells were cultured in 37 °C, 5% CO<sub>2</sub> incubator. For replicative senescence, passage culture of MEFs with or without *B. adolescentis* (bacteria:cell,100:1) are maintained until passage 12 (p12) according to senescence-related morphologic alterations. As for induction senescence (6, 7), 40nM doxorubicin (SIGMA-ALDRICH, Germany) was added to culture medium for 3 days and then replaced with fresh complete culture medium for 3 days. The entire cycle lasted 12 days prior to co-cultured with PBS or *B. adolescentis* for 6 days. Senescence-associated  $\beta$ -galactosidase (SA- $\beta$ -gal) staining assay was performed following the manufacturer's instructions.

## **Hematoxylin-Eosin staining and immunohistochemistry**

Brain tissues were fixed in 4% paraformaldehyde at room temperature and HE staining was conducted to assess morphological changes. CA3 region of hippocampus was magnified and the number of surviving neurons were counted.

The paraffin embedded brain tissues were deparaffinized and rehydrated, followed by antigen retrieval. After blocking endogenous peroxidase activity, tissues were sealed with 3% BSA and incubated with primary and secondary antibody. Finally, the slices was stained with DAB, dehydrated and sealed with neutral gum. The images were scanned with Panoramic Scanner (Panoramic DESK, 3D HISTECH, Hungary) and observed with Caseviewer C.V 2.3.

## ***B. adolescentis* and *E. coli* OP50 culture and preparation**

*Bifidobacterium adolescentis* bio-67127 (ATCC 15703) was obtained from Biobw Biotechnology Co., Ltd (Beijing, China) and cultured in modified reinforced clostridial medium (ATCC Medium 2107) with anaerobic gas mixture (80% N<sub>2</sub>, 10% CO<sub>2</sub> and 10% H<sub>2</sub>) at 37°C. *E. coli* OP50 was cultured in Luria-Bertani (LB) liquid medium at 37°C with shaking overnight.

For mice, *B. adolescentis* was heat-inactivated in 95°C water bath for 15 min and adjusted to a final concentration of 10<sup>9</sup> CFU/mL. Each mouse was gavaged with 200 µL sterile PBS or pretreated *B. adolescentis* every other day. For cell assay, MEFs were co-cultured with heat-inactivated *B. adolescentis* slurry in the ratio of

1:100 during subculture process. For *D. melanogaster*, *B. adolescentis* deposit was resuspended with 2.5% sucrose solution to the concentration of  $10^{10}$  CFU/mL and then heat-inactivated. For intervention group, *B. adolescentis* slurry was mixed with standard cornmeal food to a final concentration of  $10^9$  CFU/mL. For control group, the same volume 2.5% sucrose solution was mixed with standard cornmeal food. For *C. elegans*, liquid *B. adolescentis* and OP50 cultures were washed, centrifuged and the deposits were adjusted to a final concentration of 0.04 mg/mL (wet weight) in M9 buffer and heat-inactivated. Worms were fed on OP50 alone or OP50 and *B. adolescentis* mixture.

#### ***D. melanogaster* stocks and husbandry**

Two wild type fly stocks: *W<sup>1118</sup>* and Canton-S were reared on standard cornmeal medium (Nutri-Fly Bloomington formulation: 3.72g agar, 35.28g cornmeal, 35.28g inactivated dried yeast, 16 mL of a 10% solution of methyl-paraben in 85% ethanol, 36 mL fruit juice, 2.9 mL 99% propionic acid for 600 mL) at 25°C with a 12/12h light/dark cycle. *B. adolescentis* was supplemented at every food change.

#### ***D. melanogaster* climbing assay**

Assessment of climbing ability was performed similarly to Guo et al. (1) with minor modifications. Briefly, three vials of 30-day-old flies (approximately 15~20 flies per vial) were transferred to a tube vertically joined by two empty plastic vials,

respectively. After gently tapped down to the bottom, the number of flies that climbed above the 8-cm mark within 10 seconds were measured to calculate the climbing index (versus the total number of flies in the tube). Each experiment was performed with 3 replicates.

### ***C. elegans* strains and synchronization**

N2 Bristol strain (*Caenorhabditis* Genetics Center, CGC) was used as wild type *C. elegans*. Mutants *sod-3* (*tm760*) and *ctl-2* (*ok1137*) were provided by the CGC. Worms were maintained at 20°C on nematode growth medium (NGM) plates seeded with OP50 strain of *Escherichia coli* before intervention. From adult day 2 (D2), worms were maintained on peptone-free modified NGM (mNGM) plates (2) seeded with different heat-inactivated bacteria. To isolate eggs, gravid adult worms were bleached in NaClO solution. Then the eggs were cultured at NGM plates to obtain a synchronized population of L4 worms.

### ***C. elegans* locomotion assay**

1200 adult worms synchronized as described in online supplementary methods were evenly picked to 20 control plates and 20 intervention plates. Then they were cultured at 20 °C and transferred to new plates every other day. Locomotion ability of worms can be measured by two indicators: movement speed and movement trajectory. On day 2, 8 and 16, 50 nematodes were randomly selected to measure the number of sine

waves( $\geq 1$  mm) that they crawled out in 30s for each group. The movement trajectory assay of worms at different time-points was conducted using a scoring method described in a previous report (3, 4). Experiments were conducted at least three times independently.

### ***C. elegans* heat stress resistance assay**

On day 4, 8 and 12, worms in each group as aforementioned were transferred from 20°C to 37°C and assayed for their response every two hours. Dead worms were counted, and the mean survival time was then calculated. Experiments were conducted three times independently.

### **CAT activity measurement**

Skeletal muscle and brain tissues were harvested and homogenized with iced PBS (25% w/v). The supernatant was used to measure CAT activity with commercial kit according to the manufacturer's instructions (Jiancheng, Nanjing).

### **UHPLC-QE-MS**

#### **Metabolites extraction**

25 mg of sample was weighted to an EP tube, and 500  $\mu$ L extract solution (acetonitrile: methanol: water = 2: 2: 1, with isotopically-labelled internal standard mixture) was added. After 30 s vortex, the samples were homogenized at 35 Hz for 4

min and sonicated for 5 min in ice-water bath. The homogenization and sonication cycle was repeated for 3 times. Then the samples were incubated for 1 h at -40°C and centrifuged at 12000 rpm for 15 min at 4°C. The resulting supernatant was transferred to a fresh glass vial for analysis. The quality control (QC) sample was prepared by mixing an equal aliquot of the supernatants from all of the samples.

### **LC-MS/MS analysis**

LC-MS/MS analyses were performed using an UHPLC system (Vanquish, Thermo Fisher Scientific) with a UPLC BEH Amide column (2.1 mm × 100 mm, 1.7 μm) coupled to Q Exactive HFX mass spectrometer (Orbitrap MS, Thermo). The mobile phase consisted of 25 mmol/L ammonium acetate and 25 ammonia hydroxide in water (pH = 9.75) (A) and acetonitrile (B). The analysis was carried with elution gradient as follows: 0~0.5 min, 95%B; 0.5~7.0 min, 95%~65% B; 7.0~8.0 min, 65%~40% B; 8.0~9.0 min, 40% B; 9.0~9.1 min, 40%~95% B; 9.1~12.0 min, 95% B. The column temperature was 30°C. The auto-sampler temperature was 4°C, and the injection volume was 2 μL.

The QE HFX mass spectrometer was used for its ability to acquire MS/MS spectra on information-dependent acquisition (IDA) mode in the control of the acquisition software (Xcalibur, Thermo). In this mode, the acquisition software continuously evaluates the full scan MS spectrum. The ESI source conditions were set as following: sheath gas flow rate as 50 Arb, Aux gas flow rate as 10 Arb, capillary temperature 320°C, full MS resolution as 60000, MS/MS resolution as 7500, collision energy as



10/30/60 in NCE mode, spray Voltage as 3.5 kV (positive) or -3.2 kV (negative), respectively.

### Data preprocessing and annotation

The raw data were converted to the mzXML format using ProteoWizard and processed with an in-house program, which was developed using R and based on XCMS, for peak detection, extraction, alignment, and integration. Then an in-house MS2 database (BiotreeDB) was applied in metabolite annotation. The cutoff for annotation was set at 0.3.

### References

1. T. Guo, Z. Nan, C. Miao, X. Jin, W. Yang, Z. Wang, Y. Tu, H. Bao, J. Lyu, H. Zheng, Q. Deng, P. Guo, Y. Xi, X. Yang, W. Ge, The autophagy-related gene Atg101 in *Drosophila* regulates both neuron and midgut homeostasis. *J Biol Chem* **294**, 5666-5676 (2019).
2. T. Komura, T. Ikeda, C. Yasui, S. Saeki, Y. Nishikawa, Mechanism underlying prolongevity induced by bifidobacteria in *Caenorhabditis elegans*. *Biogerontology* **14**, 73-87 (2013).
3. J. Gruber, L. F. Ng, S. Fong, Y. T. Wong, S. A. Koh, C. B. Chen, G. Shui, W. F. Cheong, S. Schaffer, M. R. Wenk, B. Halliwell, Mitochondrial changes in ageing *Caenorhabditis elegans*--what do we learn from superoxide dismutase knockouts? *PLoS One* **6**, e19444 (2011).
4. R. Hosono, Y. Sato, S. I. Aizawa, Y. Mitsui, Age-dependent changes in mobility and separation of the nematode *Caenorhabditis elegans*. *Exp Gerontol* **15**, 285-289 (1980).
5. M. E. Durkin, X. Qian, N. C. Popescu, D. R. Lowy, Isolation of Mouse Embryo Fibroblasts. *Bio Protoc* **3**, (2013).
6. O. V. Leontieva, A. V. Gudkov, M. V. Blagosklonny, Weak p53 permits senescence during cell cycle arrest. *Cell Cycle* **9**, 4323-4327 (2010).
7. N. V. Petrova, A. K. Velichko, S. V. Razin, O. L. Kantidze, Small molecule compounds that induce cellular senescence. *Aging Cell* **15**, 999-1017 (2016).

**Supplementary Table 1** Baseline characteristics of study participants

| Characteristics         | 20-40 yrs (n=46) | 40-60 yrs (n=77) | 60+ yrs (n=43) | P-value |
|-------------------------|------------------|------------------|----------------|---------|
| Age(years) <sup>a</sup> | 29.52 ± 4.58     | 49.35 ± 5.57     | 65.91 ± 5.20   | <0.001  |
| BMI <sup>a</sup>        | 21.84 ± 3.10     | 23.01 ± 2.36     | 22.80 ± 2.81   | 0.063   |
| Gender                  |                  |                  |                | 0.095   |
| Male <sup>b</sup>       | 19 (41.3%)       | 46 (59.7%)       | 26 (60.5%)     |         |
| Female <sup>b</sup>     | 27 (58.7%)       | 31 (40.3%)       | 17 (39.5%)     |         |

BMI, body mass index.

a Data are presented as mean ± standard deviation (SD).

b Data are presented as n (%).

**Supplementary Table 2** Bacteria species with significant different abundance in two age groups

| Species name                                   | Group     | Mean        | LDA_value   | P-value     | -log10(P-value) |
|------------------------------------------------|-----------|-------------|-------------|-------------|-----------------|
| s__Bifidobacterium_adolescentis                | 20-40 yrs | 3.0446355   | 2.671129472 | 0.00085369  | 3.068699785     |
| s__Ruminococcus_lactaris_CC59_002D             | 20-40 yrs | 3.172895537 | 2.61724204  | 0.001072556 | 2.969580223     |
| s__Clostridium_scindens                        | 20-40 yrs | 2.216776533 | 2.010199039 | 0.001345179 | 2.871219962     |
| s__Anaerostipes_hadrus_g__Anaerostipes         | 20-40 yrs | 3.358276655 | 2.869865052 | 0.00548915  | 2.260494873     |
| s__Sutterellaceae_bacterium_YL45               | 20-40 yrs | 2.243045036 | 1.904929128 | 0.009347217 | 2.029317673     |
| s__Odoribacter_splanchnicus_DSM_20712          | 20-40 yrs | 3.486786784 | 2.676308673 | 0.010302087 | 1.98707478      |
| s__Bacillus_litoralis_g__Bacillus              | 40+ yrs   | 1.528816393 | 1.541356879 | 0.010584609 | 1.975325199     |
| s__Streptococcus_salivarius_subsp__salivarius  | 20-40 yrs | 3.716383502 | 3.179962646 | 0.011039753 | 1.957040642     |
| s__Sporosarcina_globispora_g__Sporosarcina     | 40+ yrs   | 1.114084366 | 1.631389744 | 0.01867647  | 1.728705201     |
| s__Faecalibacterium_prausnitzii_g__Alistipes   | 20-40 yrs | 2.648454781 | 2.060953239 | 0.019540852 | 1.709056505     |
| s__Desulfovibrio_legallii                      | 20-40 yrs | 1.878034249 | 1.630443484 | 0.024698262 | 1.607333599     |
| s__Lactococcus_raffinolactis                   | 20-40 yrs | 0.628050502 | 2.393339787 | 0.030727524 | 1.512472428     |
| s__Clostridiales_bacterium_10_3b               | 20-40 yrs | 0.605430199 | 2.786545889 | 0.030727524 | 1.512472428     |
| s__gut_metagenome_g__norank_f__Ruminococcaceae | 20-40 yrs | 3.454330982 | 2.522238798 | 0.033792072 | 1.471185173     |
| s__Butyricimonas_synergistica                  | 20-40 yrs | 1.683921766 | 1.600661619 | 0.038071926 | 1.419395157     |
| s__Ruminococcaceae_bacterium_GD6               | 20-40 yrs | 1.668610887 | 1.533225097 | 0.041676262 | 1.380111243     |
| s__Faecalitalea_cylindroides                   | 20-40 yrs | 0.762015992 | 2.130551051 | 0.041910532 | 1.377676828     |

|                                |           |             |             |             |             |
|--------------------------------|-----------|-------------|-------------|-------------|-------------|
| s__Ruminococcus_bicirculans    | 20-40 yrs | 3.456784215 | 2.743933257 | 0.04193292  | 1.377444899 |
| s__Ruminococcus_sp__16442      | 20-40 yrs | 2.046634834 | 1.567285539 | 0.04232817  | 1.373370503 |
| s__Paenibacillus_castaneae     | 40+ yrs   | 0.629221281 | 1.940092166 | 0.043578596 | 1.360726768 |
| s__Peptoniphilus_sp__BV3C26    | 20-40 yrs | 0.637049309 | 2.332493876 | 0.046376721 | 1.333699961 |
| s__intestinal_bacterium_CG19_1 | 20-40 yrs | 0.296939101 | 2.327615817 | 0.047584161 | 1.322537581 |
| s__Prevotella_colorans         | 20-40 yrs | 0.668697915 | 2.005607282 | 0.049103783 | 1.308885045 |

---

**Supplementary Table 3** Increase of lifespan in wile-type fly strains

| Fly Strain                | Median Lifespan<br>(days) | % Increase in<br>Median Lifespan | Mean lifespan<br>(days) | % Increase in Mean<br>Lifespan | Mean Maximum<br>Lifespan (days) | % Increase in Mean<br>Maximum Lifespan |
|---------------------------|---------------------------|----------------------------------|-------------------------|--------------------------------|---------------------------------|----------------------------------------|
| <i>w<sup>1118</sup></i> ♂ | 46.00 vs 38.00            | 21.05%                           | 45.00 vs 35.78          | 25.77%                         | 64.20 vs 58.20                  | 10.31%                                 |
| <i>w<sup>1118</sup></i> ♀ | 60.00 vs 49.00            | 22.45%                           | 56.53 vs 45.67          | 23.78%                         | 68.00 vs 62.40                  | 8.97%                                  |
| Canton S ♂                | 46.00 vs 37.00            | 24.32%                           | 44.88 vs 37.99          | 18.14%                         | 60.70 vs 59.30                  | 3.36%                                  |
| Canton S ♀                | 42.00 vs 34.00            | 23.53%                           | 40.02 vs 33.97          | 17.81%                         | 57.00 vs 55.20                  | 3.26%                                  |
